# Supplementary material
Source: PubMed Central journal article supplement (PMC4401639)
Supplement: NIHMS669020-supplement-1.pdf [file NIHMS669020-supplement-1.pdf]

**Supplementary Table 1**

Antibodies utilized in this study.

| <b>Antibody</b>                      | <b>Source</b>            | <b>Catalog#</b> | <b>Dilution</b> |
|--------------------------------------|--------------------------|-----------------|-----------------|
| anti-BrdU                            | Abcam                    | ab125306        | kit             |
| $\alpha$ SMA                         | Thermo Scientific        | RB-9010-P1      | 1:100           |
| $\alpha$ SMA                         | Abcam                    | ab112022        | 1:100           |
| collagen IV                          | Cosmo Bio Co.,LTD.       | LSL-LB-1403     | 1:1000          |
| desmin                               | Thermo Scientific        | RB-9014-P1      | 1:100           |
| endomucin                            | Santa Cruz Biotechnology | 65495           | 1:100           |
| NG2                                  | Millipore                | AB5320          | 1:50            |
| Hes                                  | Sigma-Aldrich            | SAB1410659      | 1:300           |
| Hey1                                 | Chemicon                 | AB5714          | 1:500           |
| CD54 (ICAM-1)                        | BioLegend                | 116102          | 1:100           |
| goat anti-human IgG(Fc)              | Thermo Scientific        | a31413          | 1:250           |
| Alexa Fluor 555 goat anti-rat IgG    | Life Technologies        | A-21434         | 1:200           |
| Alexa Fluor 555 goat anti-rabbit IgG | Life Technologies        | A-21428         | 1:200           |
